# Supplementary material
Source: ML conference proceedings conference paper supplement (https://openreview.net/forum?id=RYL_709qe9Y)
Supplement: supplementary_material [file attachment]

## Supplementary Material

### A Missing proofs

**Proposition A.1.** For any arbitrary non-negative real numbers  $a_1, \dots, a_T$ , we have

$$\sum_{t=1}^T \frac{a_t}{1 + a_{1:t}} \leq \log(1 + a_{1:T}).$$

*Proof.* For any  $a, b > 0$ , we have

$$\frac{a}{b+a} = \int_{x=0}^a \frac{1}{b+a} dx \leq \int_{x=0}^a \frac{1}{b+x} dx = \log(b+a) - \log(b). \quad (8)$$

The proof now follows from induction. The base case of  $t = 1$  follows directly from (8) with  $a$  set to  $a_1$  and  $b$  set to 1. Assuming that the inequality holds for  $T - 1$ , let us consider the induction step.

$$\sum_{t=1}^T \frac{a_t}{1 + a_{1:t}} = \frac{a_T}{1 + a_{1:T}} + \sum_{t=1}^{T-1} \frac{a_t}{1 + a_{1:t}} \leq \frac{a_T}{1 + a_{1:T}} + \log(1 + a_{1:T-1}) \leq \log(1 + a_{1:T}),$$

where the last inequality again follows from (8) with  $a$  set to  $a_T$  and  $b$  set to  $1 + a_{1:T-1}$ .  $\square$

**Proposition A.2.** Consider any  $c \in \mathbb{R}^d$  and  $r \geq 0$  and let  $y = \operatorname{argmin}_{\|x\| \leq 1} \frac{r}{2} \|x\|^2 + \langle c, x \rangle$ . Then, if  $\|c\| \geq r$ , we have  $y = \frac{-c}{\|c\|}$ .

*Proof.* Consider  $f(x) = \frac{r}{2} \|x\|^2 + \langle c, x \rangle$ . For any  $\|x\| \leq 1$ , we have the following.

$$f(x) \geq \frac{r}{2} \|x\|^2 - \|c\| \|x\| \geq \min_{\|z\| \leq 1} \left( \frac{r}{2} \|z\|^2 - \|c\| \|z\| \right),$$

since  $\|c\| \geq r$ , it is an easy exercise to verify that the RHS is minimized at  $\|z\| = 1$  and thus

$$f(x) \geq \frac{r}{2} - \|c\|.$$

On the other hand, substituting  $y = \frac{-c}{\|c\|}$ , we have  $f(y) = \frac{r}{2} - \|c\|$  and the proposition follows.  $\square$

**Lemma A.3.** Let  $c_1, \dots, c_n$  be independent random unit vectors in  $\mathbb{R}^d$  (distributed uniformly on the sphere), for some parameters  $n, d$ , and let  $Z = \sum_{t=1}^n c_t$ . Then we have  $\mathbb{E}[\|Z\|] \geq \Omega(\sqrt{n})$ .

*Proof.* First, we note that since  $c_t$  are independent, we have

$$\mathbb{E}[\|Z\|^2] = \sum_{t=1}^n \|c_t\|^2 = n.$$

We also have

$$\mathbb{E}[(\|Z\|^2)^2] = \mathbb{E}\left[\left(\sum_i \|c_i\|^2 + \sum_{i \neq j} \langle c_i, c_j \rangle\right)^2\right] \leq n^2 + \sum_{i \neq j} \mathbb{E}[\langle c_i, c_j \rangle^2] \leq 2n^2.$$

Thus by applying the Paley–Zygmund inequality to the random variable  $\|Z\|^2$ , we have  $\Pr[\|Z\|^2 \geq n/4] = \Omega(1)$ , and thus  $\Pr[\|Z\| \geq \sqrt{n}/2] = \Omega(1)$ . Thus the expected value is  $\Omega(\sqrt{n})$ .  $\square$

## B A sharper analysis of FTRL

Our goal in this section is to prove Theorem 3.1. As a first step, let us define  $\psi_t(x) = \langle c_t, x \rangle + \frac{r_t}{2} \|x\|^2$ , (with the understanding that  $c_0 = 0$ ) so that by definition, we have

$$x_{t+1} = \operatorname{argmin}_{\|x\| \leq 1} \psi_{0:t}(x).$$

**Lemma B.1.** *Let  $\psi_t, x_t$  be as defined above. Then for any  $m \in [T]$  and any vector  $u$  with  $\|u\| \leq 1$ , we have*

$$\psi_{0:m}(x_{m+1}) + \sum_{t=m+1}^T \psi_t(x_{t+1}) \leq \psi_{0:T}(u).$$

When  $m = 0$ , the lemma is usually referred to as the FTL lemma (see e.g., [14]), and is proved by induction. Our proof follows along the same lines.

*Proof.* From the definition of  $x_{T+1}$  (as the minimizer), we have

$$\psi_{0:T}(u) \geq \psi_{0:T}(x_{T+1}).$$

Now, we can clearly write  $\psi_{0:T}(x_{T+1}) = \psi_T(x_{T+1}) + \psi_{0:T-1}(x_{T+1})$ . Next, observe that from the definition of  $x_T$ , we have  $\psi_{0:T-1}(x_{T+1}) \geq \psi_{0:T-1}(x_T)$ . Plugging this above,

$$\psi_{0:T}(u) \geq \psi_T(x_{T+1}) + \psi_{0:T-1}(x_T).$$

Once again, writing  $\psi_{0:T-1}(x_T) = \psi_{T-1}(x_T) + \psi_{0:T-2}(x_T)$  and now using the definition of  $x_{T-1}$ , we obtain

$$\psi_{0:T}(u) \geq \psi_T(x_{T+1}) + \psi_{T-1}(x_T) + \psi_{0:T-2}(x_{T-1}).$$

Using the same reasoning again, and continuing until we reach the subscript  $0:m$  in the last term of the RHS, we obtain the desired inequality.  $\square$

We are now ready to prove Theorem 3.1.

*Proof of Theorem 3.1.* Let us focus on Part 2 for now (see Lemma B.4 for Part 1). Note that we can rearrange the bound we wish to prove, i.e., (3), as follows. Let  $z$  be the unit vector in the direction of  $-c_{1:S}$ , so that  $-\|c_{1:S}\| = \sum_{t=1}^S \langle c_t, z \rangle$ . Then (3) can be rewritten as

$$\sum_{t=1}^S \langle c_t, z - u \rangle + \sum_{t>S} \langle c_t, x_t - u \rangle \leq \frac{\sqrt{1 + \sigma_{1:S}}}{2} + \frac{18 + 8 \log(1 + \sigma_{1:T})}{\alpha}.$$

As a first step, we observe that  $\langle c_{1:S}, z \rangle \leq \langle c_{1:S}, x_{S+1} \rangle$ ; indeed,  $\|x_{S+1}\| \leq 1$  by definition. Thus, it will suffice to prove that

$$\sum_{t=1}^S \langle c_t, x_{S+1} - u \rangle + \sum_{t>S} \langle c_t, x_t - u \rangle \leq \frac{\sqrt{1 + \sigma_{1:S}}}{2} + \frac{18 + 8 \log(1 + \sigma_{1:T})}{\alpha}. \quad (9)$$

For proving this, we first appeal to Lemma B.1. Instantiating the lemma with  $m = S$  and plugging in the definition of  $\psi$ , we get

$$\langle c_{0:S}, x_{S+1} \rangle + \frac{r_{0:S}}{2} \|x_{S+1}\|^2 + \sum_{t>S} \langle c_t, x_{t+1} \rangle + \frac{r_t}{2} \|x_{t+1}\|^2 \leq \langle c_{0:T}, u \rangle + \frac{r_{0:T}}{2} \|u\|^2.$$

Noting that  $c_0 = 0$  and rearranging, we get:

$$\begin{aligned} & \sum_{t=1}^S \langle c_t, x_{S+1} - u \rangle + \sum_{t>S} \langle c_t, x_t - u \rangle \\ & \leq \frac{r_{0:S}}{2} (\|u\|^2 - \|x_{S+1}\|^2) + \sum_{t>S} \left( \frac{r_t}{2} (\|u\|^2 - \|x_{t+1}\|^2) + \langle c_t, x_t - x_{t+1} \rangle \right) \\ & \leq \frac{r_{0:S}}{2} + \sum_{t>S} \left( \frac{r_t}{2} (\|u\|^2 - \|x_{t+1}\|^2) + \langle c_t, x_t - x_{t+1} \rangle \right). \end{aligned}$$

The LHS matches the quantity we wish to bound in (9), and thus let us analyze the RHS quantity, which we denote by  $\Omega$ .

The next observation is that if  $t > S$  and  $\sqrt{1 + \sigma_{1:t}} \geq \frac{4}{\alpha}$ , then the vector  $x_{t+1}$  has norm exactly 1. This can be shown as follows. If  $t > S$ , by the definition of  $S$ , we have  $\|c_{1:t}\| > \frac{\alpha}{4}(1 + \sigma_{1:t})$ . Thus, the vector  $-c_{1:t}/\sqrt{1 + \sigma_{1:t}}$  has norm  $\geq 1$ . From the definition of  $x_{t+1}$  (see (2)), this means that the global minimizer (without the constraint  $\|x\| \leq 1$ ) of the quadratic form is a point outside the ball, and thus the minimizer of the constrained problem is its projection, which is thus a unit vector. See Proposition A.2 for further details. We next have the following claim.

*Claim.* Let  $M$  be the smallest index  $> S$  for which  $\sqrt{1 + \sigma_{1:M}} \geq \frac{4}{\alpha}$ . Then

$$\sqrt{1 + \sigma_{1:M-1}} \leq \max \left\{ \sqrt{1 + \sigma_{1:S}}, \frac{4}{\alpha} \right\}.$$

The claim follows by a simple case analysis. If  $M = S + 1$ , then clearly the LHS is  $\sqrt{1 + \sigma_{1:S}}$ . Otherwise, from the definition of  $M$ , we have the desired bound.

Let us get back to bounding the quantity  $\Omega$  defined above. We split the sum into indices  $\leq M - 1$  and  $\geq M$ . The nice consequence of the observation above is that for all  $t \geq M$ , as  $\|x_{t+1}\| = 1$ , we have  $\|u\|^2 - \|x_{t+1}\|^2 \leq 0$ , thus the term disappears. Also, for  $t < M$ , we use the simple bound  $\frac{r_t}{2}(\|u\|^2 - \|x_{t+1}\|^2) \leq \frac{r_t}{2}$ . This gives

$$\Omega \leq \frac{r_{0:M-1}}{2} + \sum_{t=S+1}^T \langle c_t, x_t - x_{t+1} \rangle.$$

Thus we only need to analyze the summation on the RHS. To bound the summation  $\sum_{t=S+1}^T \langle c_t, x_t - x_{t+1} \rangle$  consider two cases for  $M$  separately: either  $M = S + 1$  or  $M > S + 1$ . If  $M = S + 1$ , then by Proposition B.3,  $\sum_{t=S+1}^T \langle c_t, x_t - x_{t+1} \rangle \leq \frac{8}{\alpha} \log(1 + \sigma_{1:T})$ . Alternatively, if  $M > S + 1$ , let us break the summation into terms with  $t \leq M - 1$  and terms with  $t \geq M$ . Proposition B.2 lets us bound the sum of the terms corresponding to  $t \leq M - 1$  by  $4\sqrt{\sigma_{1:M-1}} < 4r_{0:M-1} \leq \frac{16}{\alpha}$ , where the last step is by definition of  $M$  and using the fact that  $M - 1 > S$ . Then Proposition B.3 lets us bound the sum of the terms with  $t \geq M$  by  $\frac{8}{\alpha} \log(1 + \sigma_{1:T})$ . Thus in all cases we have:

$$\Omega \leq \frac{r_{0:M-1}}{2} + \frac{16}{\alpha} + \frac{8}{\alpha} \log(1 + \sigma_{1:T}) \leq \frac{\sqrt{1 + \sigma_{1:S}}}{2} + \frac{18}{\alpha} + \frac{8}{\alpha} \log(1 + \sigma_{1:T}),$$

where in the last step we used the claim and bounded the maximum with a sum.  $\square$

## B.1 Auxiliary lemmas

**Proposition B.2.** For any time step  $t \leq T$ , the iterates of the FTRL procedure satisfy:

$$\|x_t - x_{t+1}\| \leq \frac{2\|c_t\|}{\sqrt{1 + \sigma_{1:t-1}}}.$$

Furthermore, in any time interval  $[A, B]$  with  $1 \leq A \leq B \leq T$ , we have

$$\sum_{t=A}^B \langle c_t, x_t - x_{t+1} \rangle \leq 4(\sqrt{\sigma_{1:B}} - \sqrt{\sigma_{1:A-1}}).$$

*Proof.* Let us first show the first part. Define  $\psi_t(x) = \langle c_t, x \rangle + \frac{r_t}{2}\|x\|^2$ . We will invoke [20, Lemma 7], using  $\phi_1 = \psi_{0:t-1}$  and  $\phi_2 = \psi_{0:t}$ . We have that  $\phi_1$  is 1-strongly convex with respect to the norm given by  $\|x\|_{t-1}^2 = r_{0:t-1}\|x\|^2$  and  $\psi_t = \phi_2 - \phi_1$  is convex and  $2\|c_t\|$  Lipschitz. Then, since  $x_t = \operatorname{argmin} \phi_1$  and  $x_{t+1} = \operatorname{argmin} \phi_2$ , [20, Lemma 7] implies:

$$\|x_t - x_{t+1}\| \leq \frac{2\|c_t\|}{r_{0:t-1}} = \frac{2\|c_t\|}{\sqrt{1 + \sigma_{1:t-1}}}.$$

We can then use this to show the ‘‘furthermore’’ part as follows. For any  $t$  in the range, we have

$$\langle c_t, x_t - x_{t+1} \rangle \leq \|c_t\| \|x_t - x_{t+1}\| \leq \frac{2\sigma_t}{\sqrt{1 + \sigma_{1:t-1}}} \leq \frac{2\sigma_t}{\sqrt{\sigma_{1:t}}} \leq 2 \int_{\sigma_{1:t-1}}^{\sigma_{1:t}} \frac{dy}{\sqrt{y}},$$

where in the third inequality, we used the fact that  $\sigma_t \leq 1$ , and in the last inequality, we upper bounded the term via an integral over an interval of length  $\sigma_t$ . Summing this over  $t$  in the interval  $[A, B]$  thus gives

$$\sum_{t=A}^B \langle c_t, x_t - x_{t+1} \rangle \leq 2 \int_{\sigma_{1:A-1}}^{\sigma_{1:B}} \frac{dy}{\sqrt{y}} = 4 (\sqrt{\sigma_{1:B}} - \sqrt{\sigma_{1:A-1}}). \quad \square$$

**Proposition B.3.** *Let  $S$  be an index such that for all  $t > S$ ,  $\|c_{1:t}\| \geq \frac{\alpha}{4}(1 + c_{1:t})$ , and let  $t > S$  be an index for which the iterates  $x_t$  and  $x_{t+1}$  of the FTRL procedure are both unit vectors. Then,*

$$\|x_t - x_{t+1}\| \leq \frac{8\|c_t\|}{\alpha(1 + \sigma_{1:t})}.$$

Furthermore, let  $M > S$  be an index such that  $\|x_t\| = 1$  for all  $t \geq M$ . Then,

$$\sum_{t=M}^T \langle c_t, x_t - x_{t+1} \rangle \leq \frac{8}{\alpha} \log(1 + \sigma_{1:T}).$$

*Proof.* For simplicity, let us denote  $g_t = c_{1:t-1}$  and  $g_{t+1} = c_{1:t}$ . If the iterates of FTRL are unit vectors, we have

$$x_t = -\frac{g_t}{\|g_t\|}; \quad x_{t+1} = -\frac{g_{t+1}}{\|g_{t+1}\|}.$$

Thus their difference can be bounded as

$$x_{t+1} - x_t = \left( \frac{g_t}{\|g_t\|} - \frac{g_t}{\|g_{t+1}\|} \right) + \left( \frac{g_t}{\|g_{t+1}\|} - \frac{g_{t+1}}{\|g_{t+1}\|} \right).$$

The second term clearly has norm  $\leq \frac{\|c_t\|}{\|g_{t+1}\|}$ . Let us bound the first term:

$$\|g_t\| \left| \frac{1}{\|g_t\|} - \frac{1}{\|g_{t+1}\|} \right| = \frac{|\|g_{t+1}\| - \|g_t\||}{\|g_{t+1}\|} \leq \frac{\|c_t\|}{\|g_{t+1}\|}.$$

Note that in the last step, we used the triangle inequality. Combining the two, we get

$$\|x_{t+1} - x_t\| \leq \frac{2\|c_t\|}{\|c_{1:t}\|} \leq \frac{8\|c_t\|}{\alpha(1 + \sigma_{1:t})},$$

as desired. Let us now show the ‘‘furthermore’’ part. From our assumptions about  $M$ , we can appeal to the first part of the proposition, and as before, we have for any  $t \geq M$ ,

$$\langle c_t, x_t - x_{t+1} \rangle \leq \|c_t\| \|x_t - x_{t+1}\| \leq \frac{8\sigma_t}{\alpha(1 + \sigma_{1:t})} \leq \frac{8}{\alpha} \int_{1+\sigma_{1:t-1}}^{1+\sigma_{1:t}} \frac{dy}{y}.$$

Now, summing this inequality over  $t \in [M, T]$  gives us

$$\sum_{t=M}^T \langle c_t, x_t - x_{t+1} \rangle \leq \frac{8}{\alpha} \int_{1+\sigma_{1:M-1}}^{1+\sigma_{1:T}} \frac{dy}{y} \leq \frac{8}{\alpha} \log(1 + \sigma_{1:T}). \quad \square$$

The next lemma is a consequence of the standard FTRL analysis. We include its proof for completeness. This is also Part (1) of Theorem 3.1.

**Lemma B.4.** *For the FTRL algorithm described earlier, for all  $N \in [T]$  and for any vector  $u$  with  $\|u\| \leq 1$ , we have*

$$\sum_{t=1}^N \langle c_t, x_t - u \rangle \leq 4.5\sqrt{1 + \sigma_{1:N}}.$$

*Proof.* Suppose we use Lemma B.1 with  $m = 0$  and  $T = N$ , then we get:

$$\sum_{t=0}^N \psi_t(x_{t+1}) \leq \psi_{0:N}(u).$$

Plugging in the value of  $\psi_t$ ,

$$\sum_{t=1}^N \langle c_t, x_t - u \rangle \leq \sum_{t=0}^N \frac{r_t}{2} (\|u\|^2 - \|x_{t+1}\|^2) + \sum_{t=1}^N \langle c_t, x_t - x_{t+1} \rangle.$$

Now, we use the naive bound of  $r_{0:N}$  for the first summation on the RHS, and use Proposition B.2 to bound the second summation by  $r_{0:N}$ . This completes the proof.  $\square$

## C Switch-once dynamic regret

**Theorem 3.3.** *Let  $\lambda \geq 1$  be a given parameter, and  $(z_t)_{t=1}^T$  be any sequence of cost values satisfying  $z_t^2 \leq 4\sigma_t$ . Let  $(q_t)_{t=1}^T$  be a valid-in-hindsight sequence. The points  $p_t$  produced by  $\mathcal{A}_{\text{ogd}}$  then satisfy:*

$$\sum_{t=1}^T z_t(p_t - q_t) \leq \lambda(1 + 3 \log(1 + \sigma_{1:T})).$$

*Proof.* The proof is analogous to that of OGD (e.g., [30]), but we need fresh ideas specific to our setup. First, observe that since  $q$  is a valid-in-hindsight sequence, we have  $q_t \in D_t$  for all  $t$ .

Thus, we have

$$\begin{aligned} (p_{t+1} - q_t)^2 &\leq (p_t - \eta_t z_t - q_t)^2 && \text{(since projection only shrinks distances)} \\ &= (p_t - q_t)^2 - 2\eta_t z_t(p_t - q_t) + \eta_t^2 z_t^2. \\ \implies z_t(p_t - q_t) &\leq \frac{(p_t - q_t)^2 - (p_{t+1} - q_t)^2}{2\eta_t} + \frac{\eta_t}{2} z_t^2. \end{aligned} \quad (10)$$

We now need to sum (10) over  $t$ . Note that the second term is easier to bound:

$$\sum_{t=1}^T \frac{\eta_t}{2} z_t^2 \leq \frac{\lambda}{2} \sum_{t=1}^T \frac{4\sigma_t}{1 + \sigma_{1:t}} \leq 2\lambda \log(1 + \sigma_{1:T}), \quad (11)$$

where the last inequality uses Proposition A.1. Suppose  $S$  is the time step at which the switch occurs in the sequence  $q$ , and let  $\delta$  be  $q_1$  (i.e., the value in the non-zero segment). We split the first term as:

$$\sum_{t=1}^T \frac{(p_t - q_t)^2 - (p_{t+1} - q_t)^2}{2\eta_t} = \sum_{t \leq S} \frac{(p_t - \delta)^2 - (p_{t+1} - \delta)^2}{2\eta_t} + \sum_{t > S} \frac{p_t^2 - p_{t+1}^2}{2\eta_t}. \quad (12)$$

Next, by setting  $\eta_0 = \lambda$ , writing

$$\frac{(p_t - \delta)^2 - (p_{t+1} - \delta)^2}{2\eta_t} = \frac{(p_t - \delta)^2}{2\eta_{t-1}} - \frac{(p_{t+1} - \delta)^2}{2\eta_t} + \frac{(p_t - \delta)^2}{2} \left( \frac{1}{\eta_t} - \frac{1}{\eta_{t-1}} \right),$$

and noting that  $\frac{1}{\eta_t} - \frac{1}{\eta_{t-1}} = \frac{\sigma_t}{\lambda}$ , we can make the summation telescope. Doing a similar manipulation for the sum over  $t > S$ , the RHS of (12) simplifies to:

$$\begin{aligned} &\frac{(p_1 - \delta)^2}{2\eta_0} - \frac{(p_{S+1} - \delta)^2}{2\eta_S} + \frac{p_{S+1}^2}{2\eta_S} - \frac{p_{T+1}^2}{2\eta_T} + \sum_{t \leq S} \frac{(p_t - \delta)^2 \sigma_t}{2\lambda} + \sum_{t > S} \frac{p_t^2 \sigma_t}{2\lambda} \\ &\leq \frac{1}{2\eta_0} + \frac{|D_S|^2}{2\eta_S} + \sum_{t=1}^T \frac{|D_t|^2 \sigma_t}{2\lambda}, \end{aligned} \quad (13)$$

where  $|D_t|$  is the length/diameter of the domain at time  $t$ , i.e.,  $|D_t|^2 = \min(1, \frac{\lambda^2}{1 + \sigma_{1:t}})$ . The inequality holds because for all  $t$ , both  $p_t$  and  $q_t$  are in  $D_t$ . Plugging in the values of  $|D_t|$  and  $\eta_t$ , the first two terms in (13) are at most  $\lambda/2$  (because  $\lambda \geq 1$ ). Thus plugging this back into (12), we get

$$\sum_{t=1}^T \frac{(p_t - q_t)^2 - (p_{t+1} - q_t)^2}{2\eta_t} \leq \lambda \left( 1 + \sum_{t=1}^T \frac{\sigma_t}{2(1 + \sigma_{1:t})} \right).$$

Finally, using Proposition A.1, the RHS above can be upper bounded by  $\lambda(1 + \frac{1}{2} \log(1 + \sigma_{1:T}))$ .

Plugging this back into (10), summing over  $t$ , and using (11), we get

$$\sum_t z_t(p_t - q_t) \leq \lambda(1 + 3 \log(1 + \sigma_{1:T})). \quad \square$$

## D Proofs for Section 4

**Theorem 4.1.** For any  $\mathcal{B}$ ,

$$\begin{aligned} \mathbb{E}[\mathcal{R}_{\mathcal{A}_{hins},\alpha}(\vec{c})] &\leq \frac{78 + 38 \log(1 + \|c\|_{1:T}^2)}{\alpha} + 40 \sqrt{\sum_{t \in \mathcal{B}} \|c_t\|^2} + \frac{20}{\alpha} \sqrt{\sum_{t \in \mathcal{B}} \|h_t\|^2} \sqrt{\log(1 + \|c\|_{1:T}^2)} \\ &= O\left(\frac{\sqrt{|\mathcal{B}|} \log T}{\alpha}\right), \text{ and } \mathbb{E}[\mathcal{Q}_{\mathcal{A}_{hins},\alpha}(\vec{c})] \leq 20 \sqrt{\|c\|_{1:T}^2}. \end{aligned}$$

*Proof.* In the proof of Theorem 3.4, we exploited the fact that Lemma 3.5 actually bounds the expected regret when  $\mathcal{B} = \emptyset$ . However, when  $\mathcal{B} \neq \emptyset$ , we have a more complicated relationship:

$$\begin{aligned} \sum_{t=1}^T \mathbb{E}[\langle c_t, \hat{x}_t - u \rangle] &= \sum_{t=1}^T p_t \langle c_t, -h_t - x_t \rangle + \langle c_t, x_t - u \rangle \\ &\leq \sum_{t \notin \mathcal{B}} p_t (-\alpha \|c_t\|^2 - \langle c_t, x_t \rangle) + \langle c_t, x_t - u \rangle + \sum_{t \in \mathcal{B}} p_t \langle c_t, -h_t - x_t \rangle + \langle c_t, x_t - u \rangle \\ &= \sum_{t=1}^T p_t (-\alpha \|c_t\|^2 - \langle c_t, x_t \rangle) + \langle c_t, x_t - u \rangle + \sum_{t \in \mathcal{B}} -p_t (\langle c_t, h_t \rangle - \alpha \|c_t\|^2) \\ &\leq \sum_{t=1}^T p_t (-\alpha \|c_t\|^2 - \langle c_t, x_t \rangle) + \langle c_t, x_t - u \rangle + \sum_{t \in \mathcal{B}} |D_{t-1}| (\|c_t\| \|h_t\| + \alpha \|c_t\|^2), \end{aligned}$$

where  $|D_{t-1}| = \frac{10}{\alpha \sqrt{1 + \|c\|_{1:t-1}^2}}$ , and the last line follows from the restrictions on  $p_t$  in Algorithm 2.

The first sum in the above expression is already controlled by Lemma 3.5. For the second sum,

$$\begin{aligned} \sum_{t \in \mathcal{B}} |D_{t-1}| (\|c_t\| \|h_t\| + \alpha \|c_t\|^2) &\leq 2 \sum_{t \in \mathcal{B}} |D_t| (\|c_t\| \|h_t\| + \alpha \|c_t\|^2) \\ &\leq 2 \sum_{t \in \mathcal{B}} \frac{10 \|c_t\|^2}{\sqrt{1 + \sum_{\tau \in \mathcal{B}, \tau \leq t} \|c_\tau\|^2}} + |D_t| \|c_t\| \|h_t\| \\ &\leq 40 \sqrt{\sum_{t \in \mathcal{B}} \|c_t\|^2} + 2 \sum_{t \in \mathcal{B}} |D_t| \|c_t\| \|h_t\| \\ \text{(by Cauchy-Schwarz)} &\leq 40 \sqrt{\sum_{t \in \mathcal{B}} \|c_t\|^2} + 2 \sqrt{\sum_{t \in \mathcal{B}} \|h_t\|^2} \sqrt{\sum_{t \in \mathcal{B}} \|c_t\|^2 |D_t|^2} \\ &\leq 40 \sqrt{\sum_{t \in \mathcal{B}} \|c_t\|^2} + \frac{20}{\alpha} \sqrt{\sum_{t \in \mathcal{B}} \|h_t\|^2} \sqrt{\log(1 + \|c\|_{1:T}^2)}. \quad \square \end{aligned}$$

**Theorem 4.2.** Set  $\alpha = \frac{1}{4}$ . Then

$$\begin{aligned} \mathbb{E}[\mathcal{R}_{\mathcal{A}_{hins},\alpha}(\vec{c})] &\leq 312 + 152 \log(1 + \|c\|_{1:T}^2) + 80 \left(1 + \sqrt{\log(1 + \|c\|_{1:T}^2)}\right) \sqrt{\sum_{t \in \mathcal{B}} \|c_t - h_t\|^2} \\ &= O\left(\log(T) + \sqrt{\sum_{t=1}^T \|c_t - h_t\|^2 \log(T)}\right), \text{ and } \mathbb{E}[\mathcal{Q}_{\mathcal{A}_{hins},\alpha}(\vec{c})] \leq 20 \sqrt{\|c\|_{1:T}^2}. \end{aligned}$$

*Proof.* The idea is to get a bound in terms of  $\|c_t - h_t\|^2$ . Since  $\alpha = \frac{1}{4}$ ,  $t \in \mathcal{B}$  is equivalent to  $\langle c_t, h_t \rangle \leq \frac{\|c_t\|^2}{4}$ . Thus if  $t \in \mathcal{B}$ :

$$\|c_t - h_t\|^2 = \|c_t\|^2 - 2\langle c_t, h_t \rangle + \|h_t\|^2 \geq \frac{\|c_t\|^2}{2} + \|h_t\|^2.$$

Therefore, we have:

$$40 \sqrt{\sum_{t \in \mathcal{B}} \|c_t\|^2} + 80 \sqrt{\sum_{t \in \mathcal{B}} \|h_t\|^2 \log(1 + \|c\|_{1:T}^2)} \leq 80(1 + \sqrt{\log(1 + \|c\|_{1:T}^2)}) \sqrt{\sum_{t \in \mathcal{B}} \|c_t - h_t\|^2}.$$

Now, by Theorem 4.1 we have:

$$\begin{aligned} \mathbb{E}[\mathcal{R}_{\mathcal{A}, \alpha}(\vec{c})] &\leq \frac{78 + 38 \log(1 + \|c\|_{1:T}^2)}{\alpha} + 40 \sqrt{\sum_{t \in \mathcal{B}} \|c_t\|^2} + \frac{20}{\alpha} \sqrt{\sum_{t \in \mathcal{B}} \|h_t\|^2 \log(1 + \|c\|_{1:T}^2)} \\ &\leq \frac{78 + 38 \log(1 + \|c\|_{1:T}^2)}{\alpha} + 80 \left(1 + \sqrt{\log(1 + \|c\|_{1:T}^2)}\right) \sqrt{\sum_{t \in \mathcal{B}} \|c_t - h_t\|^2}. \quad \square \end{aligned}$$

## E Proofs for Section 5

**Theorem 5.2.** *Let  $\mathcal{A}$  be any deterministic algorithm for OLO with hints that makes at most  $C\sqrt{T} < T/2$  queries, for some parameter  $C > 0$ . Then there is a sequence cost vectors  $c_t$  and hints  $h_t$  of unit length such that (a)  $h_t = c_t$  whenever  $\mathcal{A}$  makes a hint query, and (b) the regret of  $\mathcal{A}$  on this input sequence is at least  $\frac{\sqrt{T}}{2(1+C)}$ .*

*Proof.* The main limitation of a deterministic algorithm  $\mathcal{A}$  is that even if it adapts to the costs seen so far, the adversary always knows if  $\mathcal{A}$  is going to make a hint query in the next step, and in steps where a query will not be made, the adversary knows which  $x_t$  will be played by  $\mathcal{A}$ .

Using this intuition, we define the following four-dimensional instance. For convenience, let  $e_0$  be a unit vector in  $\mathbb{R}^4$ , and let  $S$  be the space orthogonal to  $e_0$ . The adversary constructs the instance iteratively, doing the following for  $t = 1, 2, \dots$ :

1. If the algorithm makes a hint query at time  $t$ , set  $h_t = c_t = e_0$ .
2. If the algorithm does not make a hint query, then if  $x_t$  is the point that will be played by the algorithm, set  $c_t$  to be a unit vector in  $S$  that is orthogonal to  $x_t$  and to  $c_1 + \dots + c_{t-1}$ . (Note that since  $S$  is a three-dimensional subspace of  $\mathbb{R}^4$ , this is always feasible.)

For convenience, define  $I_t$  to be the set of indices  $\leq t$  in which the algorithm has asked for a hint. Then we first observe that for all  $t$ ,

$$\left\| \sum_{j \in [t] \setminus I_t} c_j \right\|^2 = t - |I_t|. \quad (14)$$

This is easy to see, because  $c_t$  is always orthogonal to  $e_0$ , and thus is also orthogonal to  $\sum_{j \in [t-1] \setminus I_{t-1}} c_j$ . The equality (14) then follows from the Pythagoras theorem.

Thus, suppose the algorithm makes  $K$  queries in total (over the course of the  $T$  steps). By assumption  $K \leq C\sqrt{T} < T/2$ . Then we have that

$$\left\| \sum_{j \in [T]} c_j \right\|^2 = K^2 + \left\| \sum_{j \in [T] \setminus I_T} c_j \right\|^2 = K^2 + T - K.$$

Thus the optimal vector in hindsight (say  $u$ ) achieves  $\sum_{j \in [T]} \langle c_j, u \rangle = -\sqrt{T - K + K^2}$ .

Let us next look at the cost of the algorithm. In every step where it makes a hint query, the best cost that  $\mathcal{A}$  can achieve is  $-1$  (by playing  $-e_0$ ). In the other steps, the construction ensures that the cost is 0. Thus the regret is at least

$$-K + \sqrt{T - K + K^2} = \frac{T - K}{K + \sqrt{T - K + K^2}} > \frac{T/2}{K + \sqrt{T}} \geq \frac{\sqrt{T}}{2(1+C)}. \quad \square$$

## F Proofs for Section 6

In order to prove Theorems 6.1 and 6.2, we first provide the following technical statement that allows us to unify much the analysis:

**Lemma F.1.** *Suppose that  $\mathcal{A}_{unc}$  is an unconstrained online linear optimization algorithm that outputs  $w_t \in \mathbb{R}^d$  in response to costs  $c_1, \dots, c_{t-1} \in \mathbb{R}^d$  satisfying  $\|c_\tau\| \leq 1$  for all  $\tau$  and guarantees for some constants  $A$  and  $B$  for all  $u \in \mathbb{R}^d$ :*

$$\mathcal{R}_{\mathcal{A}_{unc}}(u, \vec{c}) \leq \epsilon + A\|u\| \sqrt{\sum_{t=1}^T \|c_t\|^2 \log(\|u\|T/\epsilon + 1)} + B\|u\| \log(\|u\|T/\epsilon + 1),$$

where  $\epsilon$  is an arbitrary user-specified constant. Further, suppose  $\mathcal{A}_{unc-1D}$  is an unconstrained online linear optimization algorithm that outputs  $y_t \in \mathbb{R}$  in response to  $g_1, \dots, g_{t-1} \in \mathbb{R}$  satisfying  $|g_\tau| \leq 1$  for all  $\tau$  and guarantees for all  $y_\star \in \mathbb{R}$ :

$$\sum_{t=1}^T g_t(y_t - y_\star) \leq \epsilon + A|y_\star| \sqrt{\sum_{t=1}^T g_t^2 \log(|y_\star|T/\epsilon + 1)} + B|y_\star| \log(|y_\star|T/\epsilon + 1).$$

Finally, suppose also that  $\mathbb{E} \left[ \sum_{t=1}^T \mathbb{1}_t \langle c_t, h_t \rangle \right] \geq M\sqrt{1 + \|c\|_{1:T}^2} - N$  and  $\mathbb{E} \left[ \sum_{t \in \mathcal{B}} \mathbb{1}_t \langle c_t, h_t \rangle \right] \leq H$  and  $\mathbb{E} \left[ \sum_{t=1}^T \mathbb{1}_t \langle c_t, h_t \rangle^2 \right] \leq F\sqrt{1 + \|c\|_{1:T}^2}$  for some constant  $M, N, H, F$ . Then both the deterministic and randomized version of Algorithm 4 guarantee:

$$\begin{aligned} \mathbb{E}[\mathcal{R}_{\mathcal{A}_{unc}}(u, \vec{c})] &\leq 2\epsilon + B\|u\| \log(\|u\|T/\epsilon + 1) + \frac{4A\|u\|(H + N)\sqrt{\log(\|u\|T/\epsilon + 1)}}{M} \\ &\quad + \frac{2AB\|u\|\sqrt{\log(\|u\|T/\epsilon + 1)} \log(2A\|u\|T\sqrt{\log(\|u\|T/\epsilon + 1)})/(M\epsilon) + 1}{M} \\ &\quad + \frac{2A^3F\|u\|\sqrt{\log(\|u\|T/\epsilon + 1)} \log(2A\|u\|T\sqrt{\log(\|u\|T/\epsilon + 1)})/(M\epsilon) + 1}{M^2}. \end{aligned}$$

*Proof of Lemma F.1.* Some algebraic manipulation of the regret definition yields:

$$\begin{aligned} \mathbb{E}[\mathcal{R}_{\mathcal{A}_{unc}}(u, \vec{c})] &\leq \mathbb{E} \left[ \inf_{y_\star} \sum_{t=1}^T \langle c_t, w_t - u \rangle - y_\star \sum_{t=1}^T \mathbb{1}_t \langle h_t, c_t \rangle - \sum_{t=1}^T \mathbb{1}_t \langle h_t, c_t \rangle (y_t - y_\star) \right] \\ &\leq \mathbb{E} \left[ \inf_{y_\star \geq 0} \sum_{t=1}^T \langle c_t, w_t - u \rangle - y_\star \sum_{t=1}^T \mathbb{1}_t |\langle h_t, c_t \rangle| + 2y_\star \sum_{t \in \mathcal{B}} \mathbb{1}_t |\langle h_t, c_t \rangle| - \sum_{t=1}^T \mathbb{1}_t \langle h_t, c_t \rangle (y_t - y_\star) \right]. \end{aligned}$$

Now using the hypothesized bounds we have

$$\begin{aligned} \mathbb{E}[\mathcal{R}_{\mathcal{A}_{unc}}(u, \vec{c})] &\leq \mathbb{E} \left[ \inf_{y_\star \geq 0} \sum_{t=1}^T \langle c_t, w_t - u \rangle - y_\star M\sqrt{1 + \|c\|_{1:T}^2} + 2y_\star H + y_\star N - \sum_{t=1}^T \mathbb{1}_t \langle h_t, c_t \rangle (y_t - y_\star) \right] \\ &\leq \inf_{y_\star \geq 0} \mathbb{E} \left[ 2\epsilon + A\|u\| \sqrt{\sum_{t=1}^T \|c_t\|^2 \log(\|u\|T/\epsilon + 1)} + B\|u\| \log(\|u\|T/\epsilon + 1) \right. \\ &\quad \left. - y_\star M\sqrt{1 + \|c\|_{1:T}^2} + 2y_\star H + y_\star N + Ay_\star \sqrt{\sum_{t=1}^t g_t^2 \log(y_\star T/\epsilon + 1)} + By_\star \log(y_\star T/\epsilon + 1) \right] \end{aligned}$$



using Jensen inequality,

$$\begin{aligned}
&\leq \inf_{y_\star \geq 0} 2\epsilon + A\|u\| \sqrt{\sum_{t=1}^T \|c_t\|^2 \log(\|u\|T/\epsilon + 1) + B\|u\| \log(\|u\|T/\epsilon + 1) - y_\star M \sqrt{1 + \|c\|_{1:T}^2}} \\
&\quad + 2y_\star H + y_\star N + Ay_\star \sqrt{\mathbb{E} \left[ \sum_{t=1}^t \mathbb{1}_t \langle c_t, h_t \rangle^2 \right] \log(y_\star T/\epsilon + 1) + By_\star \log(y_\star T/\epsilon + 1)} \\
&\leq \inf_{y_\star \geq 0} 2\epsilon + A\|u\| \sqrt{\sum_{t=1}^T \|c_t\|^2 \log(\|u\|T/\epsilon + 1) + B\|u\| \log(\|u\|T/\epsilon + 1) - y_\star M \sqrt{1 + \|c\|_{1:T}^2}} \\
&\quad + 2y_\star H + y_\star N + Ay_\star \sqrt{F \sqrt{1 + \|c\|_{1:T}^2} \log(y_\star T/\epsilon + 1) + By_\star \log(y_\star T/\epsilon + 1)}
\end{aligned}$$

with a little rearrangement,

$$\begin{aligned}
&\leq \inf_{y_\star \geq 0} 2\epsilon + A\|u\| \sqrt{\sum_{t=1}^T \|c_t\|^2 \log(\|u\|T/\epsilon + 1) + B\|u\| \log(\|u\|T/\epsilon + 1) - \frac{y_\star}{2} M \sqrt{\|c\|_{1:T}^2}} \\
&\quad + 2y_\star H + y_\star N + By_\star \log(y_\star T/\epsilon + 1) \\
&\quad + Ay_\star \sqrt{F \sqrt{1 + \|c\|_{1:T}^2} \log(y_\star T/\epsilon + 1) - \frac{y_\star}{2} M \sqrt{1 + \|c\|_{1:T}^2}} \\
&\leq \inf_{y_\star \geq 0} 2\epsilon + A\|u\| \sqrt{\sum_{t=1}^T \|c_t\|^2 \log(\|u\|T/\epsilon + 1) + B\|u\| \log(\|u\|T/\epsilon + 1) - \frac{y_\star}{2} M \sqrt{\|c\|_{1:T}^2}} \\
&\quad + 2y_\star H + y_\star N + By_\star \log(y_\star T/\epsilon + 1) + \sup_X Ay_\star \sqrt{FX \log(y_\star T/\epsilon + 1)} - \frac{y_\star}{2} MX \\
&\leq \inf_{y_\star \geq 0} 2\epsilon + A\|u\| \sqrt{\sum_{t=1}^T \|c_t\|^2 \log(\|u\|T/\epsilon + 1) + B\|u\| \log(\|u\|T/\epsilon + 1) - \frac{y_\star}{2} M \sqrt{\|c\|_{1:T}^2}} \\
&\quad + 2y_\star H + y_\star N + By_\star \log(y_\star T/\epsilon + 1) + \frac{y_\star A^2 F \log(y_\star T/\epsilon + 1)}{2M}.
\end{aligned}$$

Now, we set

$$y_\star = \frac{2A\|u\| \sqrt{\log(\|u\|T/\epsilon + 1)}}{M}.$$

This yields

$$\begin{aligned}
&\mathbb{E}[\mathcal{R}_{\mathcal{A}_{\text{unc}}}(u, \vec{c})] \\
&\leq 2\epsilon + B\|u\| \log(\|u\|T/\epsilon + 1) + 2y_\star H + y_\star N + By_\star \log(y_\star T/\epsilon + 1) + \frac{y_\star A^2 F \log(y_\star T/\epsilon + 1)}{2M} \\
&\leq 2\epsilon + B\|u\| \log(\|u\|T/\epsilon + 1) + \frac{4A\|u\|(H + N) \sqrt{\log(\|u\|T/\epsilon + 1)}}{M} \\
&\quad + \frac{2AB\|u\| \sqrt{\log(\|u\|T/\epsilon + 1)} \log(2A\|u\|T \sqrt{\log(\|u\|T/\epsilon + 1)})/(M\epsilon) + 1}{M} \\
&\quad + \frac{2A^3 F \|u\| \sqrt{\log(\|u\|T/\epsilon + 1)} \log(2A\|u\|T \sqrt{\log(\|u\|T/\epsilon + 1)})/(M\epsilon) + 1}{M^2}. \quad \square
\end{aligned}$$

Now, to prove Theorem 6.1, it suffices to instantiate the Lemma. We restate the Theorem below for convenience:

**Theorem 6.1.** *The randomized version of Algorithm 4 guarantees an expected regret at most:*

$$2\epsilon + \tilde{O} \left( \frac{\left( \|u\| \sqrt{\log(\|u\|T/\epsilon)} \left[ K + \frac{\log(\|u\|T/\epsilon) \log \log(T\|u\|/\epsilon)}{K} + \sqrt{\sum_{t \in \mathcal{B}} \|h_t\|^2 \log(T)} \right] \right)}{\alpha} \right),$$

with expected query cost at most  $2K \sqrt{\|c\|_{1:T}^2}$ .

*Proof.* Define

$$p_t = \min \left( 1, \frac{K}{\alpha \sqrt{1 + \|c\|_{1:t}^2}} \right),$$

so that in the randomized version of Algorithm 4, at round  $t$ , we ask for a hint with probability  $p_{t-1}$ . Clearly, the expected query cost is:

$$\mathbb{E} \left[ \sum_{t=1}^T \mathbb{1}_t \langle c_t, h_t \rangle \right] = \sum_{t=1}^T \alpha p_{t-1} \|c_t\|^2 \leq K \sum_{t=1}^T \frac{\|c_t\|^2}{\sqrt{\|c\|_{1:t}^2}} \leq 2K \sqrt{\|c\|_{1:T}^2}.$$

Now, to bound the regret we consider two cases. First, if  $1 + \|c\|_{1:T}^2 \leq \frac{K^2}{\alpha^2}$ , then we have:

$$\begin{aligned} \mathbb{E}[\mathcal{R}_{\mathcal{A}_{\text{unc}}}(u, \vec{c})] &\leq \mathbb{E} \left[ \sum_{t=1}^T \langle c_t, w_t - u \rangle - \sum_{t=1}^T \mathbb{1}_t \langle c_t, h_t \rangle y_t \right] \leq \mathbb{E} \left[ \sum_{t=1}^T \langle c_t, w_t - u \rangle + \sum_{t=1}^T g_t(y_t - 0) \right] \\ &\leq 2\epsilon + A\|u\| \sqrt{\sum_{t=1}^T \|c_t\|^2 \log(\|u\|T/\epsilon + 1)} + B\|u\| \log(\|u\|T/\epsilon + 1) \\ &\leq 2\epsilon + \frac{A\|u\|K \sqrt{\log(\|u\|T/\epsilon + 1)}}{\alpha} + B\|u\| \log(\|u\|T/\epsilon + 1), \end{aligned}$$

and so the result follows. Thus, we may assume  $1 + \|c\|_{1:T}^2 > \frac{K^2}{\alpha^2}$ . In this case, we will calculate values for  $M$ ,  $H$ , and  $F$  to use in tandem with Lemma F.1. First,

$$\mathbb{E} \left[ \sum_{t=1}^T \mathbb{1}_t \langle c_t, h_t \rangle^2 \right] \leq \sum_{t=1}^T p_{t-1} \|c_t\|^2 \leq \frac{K}{\alpha} \sum_{t=1}^T \frac{\|c_t\|^2}{\sqrt{\|c\|_{1:t}^2}} \leq \frac{2K}{\alpha} \sqrt{1 + \|c\|_{1:T}^2}.$$

So that we may take  $F = \frac{2K}{\alpha}$ . Next, note that  $p_T = \frac{K}{\alpha \sqrt{1 + \|c\|_{1:T}^2}}$  by our casework assumption.

Therefore:

$$-\alpha p_T \|c\|_{1:T}^2 \leq \alpha - \alpha p_T (1 + \|c\|_{1:T}^2) \leq \alpha - K \sqrt{\|c\|_{1:T}^2},$$

so that we may take  $M = K$  and  $N = \alpha$ . Finally,

$$\sum_{t \in \mathcal{B}} p_t |\langle c_t, h_t \rangle| \leq K \sum_{t \in \mathcal{B}} \frac{\|c_t\| \|h_t\|}{\alpha \sqrt{\|c\|_{1:t}^2}} \leq \frac{K}{\alpha} \sqrt{\sum_{t \in \mathcal{B}} \frac{\|c_t\|^2}{\|c\|_{1:t}^2} \sum_{t \in \mathcal{B}} \|h_t\|^2} \leq \frac{K}{\alpha} \sqrt{\sum_{t \in \mathcal{B}} \|h_t\|^2 \log(1 + \|c\|_{1:T}^2)},$$

so that we may take  $H = \frac{K}{\alpha} \sqrt{\sum_{t \in \mathcal{B}} \|h_t\|^2 \log(1 + \|c\|_{1:T}^2)}$ . Then Lemma F.1 implies

$$\begin{aligned}
\mathbb{E}[\mathcal{R}_{\mathcal{A}_{\text{unc}}}(u, \vec{c})] &\leq 2\epsilon + B\|u\| \log(\|u\|T/\epsilon + 1) + \frac{4A\|u\|(H + \alpha)\sqrt{\log(\|u\|T/\epsilon + 1)}}{M} \\
&\quad + \frac{2AB\|u\|\sqrt{\log(\|u\|T/\epsilon + 1)} \log(2A\|u\|T\sqrt{\log(\|u\|T/\epsilon + 1)})/(M\epsilon) + 1}{M} \\
&\quad + \frac{2A^3F\|u\|\sqrt{\log(\|u\|T/\epsilon + 1)} \log(2A\|u\|T\sqrt{\log(\|u\|T/\epsilon + 1)})/(M\epsilon) + 1}{M^2} \\
&\leq 2\epsilon + B\|u\| \log(\|u\|T/\epsilon + 1) + \frac{4A\|u\|\sqrt{\log(\|u\|T/\epsilon + 1)} \sum_{t \in \mathbb{B}} \|h_t\|^2 \log(1 + \|c\|_{1:T}^2)}{\alpha} \\
&\quad + \frac{4A\|u\|\alpha\sqrt{\log(\|u\|T/\epsilon + 1)}}{K} \\
&\quad + \frac{2AB\|u\|\sqrt{\log(\|u\|T/\epsilon + 1)} \log(2A\|u\|T\sqrt{\log(\|u\|T/\epsilon + 1)})/(K\epsilon) + 1}{K} \\
&\quad + \frac{2A^3\|u\|\sqrt{\log(\|u\|T/\epsilon + 1)} \log(2A\|u\|T\sqrt{\log(\|u\|T/\epsilon + 1)})/(K\epsilon) + 1}{K\alpha}.
\end{aligned}$$

Simplifying the expression yields

$$\begin{aligned}
&\mathbb{E}[\mathcal{R}_{\mathcal{A}_{\text{unc}}}(u, \vec{c})] \\
&\leq 2\epsilon + \tilde{O}\left(\frac{\|u\|\left(\frac{\log(\|u\|T/\epsilon)^{3/2} \log \log(T\|u\|/\epsilon)}{K} + \sqrt{\log(\|u\|T/\epsilon)} \sum_{t \in \mathbb{B}} \|h_t\|^2 \log(1 + \|c\|_{1:T}^2)\right)}{\alpha}\right). \square
\end{aligned}$$

## F.1 Deterministic version

Before providing the proof of Theorem 6.2, we need the following auxiliary statement.

**Lemma F.2.** *Suppose  $\mathbb{B} = \emptyset$ . Then for all  $t$ , the deterministic version of Algorithm 4 guarantees:*

$$\sqrt{\|c\|_{1:T-1}^2} - K - 1 - \frac{K}{2\alpha} \leq \sum_{t=1}^T \mathbb{1}_t \langle c_t, h_t \rangle \leq K\sqrt{1 + \|c\|_{1:T-1}^2}.$$

*Proof.* Define  $Z_t = 1 + \sum_{t'=1}^t \mathbb{1}_{t'} \langle c_{t'}, h_{t'} \rangle$  with  $Z_0 = 1$ . We will instead prove the equivalent bound:

$$K\sqrt{\|c\|_{1:T-1}^2} - K - \frac{K}{2\alpha} \leq Z_T \leq 1 + K\sqrt{1 + \|c\|_{1:T-1}^2}.$$

The upper bound is immediate from the definition of  $Z_T$  and the fact that  $\langle c_t, h_t \rangle \leq 1$ . For the lower bound, we will prove a slightly different statement that we will later show implies the desired result:

$$\text{for all } t \geq 0, Z_t \geq K\sqrt{1 + \|c\|_{1:t}^2} - K \sum_{t' \leq t, \sqrt{\|c\|_{1:t'}^2} \leq \frac{1}{2\alpha}} \frac{\|c_{t'}\|^2}{2\sqrt{\|c\|_{1:t'}^2}}.$$

We proceed by induction. The base case for  $t = 0$  is clear from definition of  $Z_t$ . Suppose the statement holds for some  $t$ . Then consider two cases, either  $Z_t < K\sqrt{1 + \|c\|_{1:t}^2}$  or not. If  $Z_t \geq K\sqrt{1 + \|c\|_{1:t}^2}$ , then  $Z_{t+1} = Z_t \geq K\sqrt{1 + \|c\|_{1:t}^2} \geq K\sqrt{1 + \|c\|_{1:t+1}^2} - K$  and so the statement holds. Alternatively, suppose  $Z_t < K\sqrt{1 + \|c\|_{1:t}^2}$ . Then:

$$\begin{aligned}
Z_{t+1} &= Z_t + \langle c_{t+1}, h_{t+1} \rangle \\
&\geq K\sqrt{1 + \|c\|_{1:t}^2} - K - \sum_{t' \leq t | \sqrt{\|c\|_{1:t'}^2} \leq \frac{K}{2\alpha}} \frac{\|c_{t'}\|^2}{2\sqrt{\|c\|_{1:t'}^2}} + \alpha \|c_{t+1}\|^2 \\
&\geq K\sqrt{1 + \|c\|_{1:t+1}^2} - \frac{K\|c_{t+1}\|^2}{2\sqrt{1 + \|c\|_{1:t}^2}} - K - \sum_{t' \leq t | \sqrt{\|c\|_{1:t'}^2} \leq \frac{K}{2\alpha}} \frac{\|c_{t'}\|^2}{2\sqrt{\|c\|_{1:t'}^2}} + \alpha \|c_{t+1}\|^2 \\
&\geq K\sqrt{1 + \|c\|_{1:t+1}^2} - \frac{K\|c_{t+1}\|^2}{2\sqrt{\|c\|_{1:t+1}^2}} - K - \sum_{t' \leq t | \sqrt{\|c\|_{1:t'}^2} \leq \frac{K}{2\alpha}} \frac{\|c_{t'}\|^2}{2\sqrt{\|c\|_{1:t'}^2}} + \alpha \|c_{t+1}\|^2 \\
&\geq \sqrt{1 + \|c\|_{1:t+1}^2} - K - \sum_{t' \leq t+1 | \sqrt{\|c\|_{1:t'}^2} \leq \frac{K}{2\alpha}} \frac{\|c_{t'}\|^2}{2\sqrt{\|c\|_{1:t'}^2}},
\end{aligned}$$

so that the induction is complete.

Finally, observe that if  $\tau$  is the largest index such that  $\sqrt{\|c\|_{1:\tau}^2} \leq \frac{K}{2\alpha}$ , then

$$\sum_{t' \leq t+1 | \sqrt{\|c\|_{1:t'}^2} \leq \frac{K}{2\alpha}} \frac{\|c_{t'}\|^2}{2\sqrt{\|c\|_{1:t'}^2}} \leq \sum_{t'=1}^{\tau} \frac{\|c_{t'}\|^2}{2\sqrt{\|c\|_{1:t'}^2}} \leq \sqrt{\|c\|_{1:\tau}^2} \leq \frac{K}{2\alpha}. \quad \square$$

Now we can prove Theorem 6.2:

**Theorem 6.2.** *If  $\mathcal{B} = \emptyset$ , then the deterministic version of Algorithm 4 guarantees:*

$$\sum_{t=1}^T \langle c_t, x_t - u \rangle \leq 2\epsilon + O\left(\frac{\|u\| \sqrt{\log(\|u\|T/\epsilon + 1)}}{\alpha} + \frac{\|u\| \log^{3/2}(\|u\|T/\epsilon) \log \log(\|u\|T/\epsilon)}{K}\right),$$

with a query cost at most  $2K\sqrt{\|c\|_{1:T}^2}$ .

*Proof.* From Lemma F.2 we have that the query cost is at most  $K\sqrt{\|c\|_{1:T}^2}$ . To bound the regret, we will appeal to Lemma F.1, which requires finding values for  $M, N, H, F$ . First, again by Lemma F.2, we have:

$$K\sqrt{1 + \|c\|_{1:T}^2} - 3K - 1 - \frac{K}{2\alpha} \leq K\sqrt{\|c\|_{1:T-1}^2} - K - 1 - \frac{K}{2\alpha} \leq \sum_{t=1}^T \mathbb{1}_t \langle c_t, h_t \rangle.$$

So that we may set  $M = K$  and  $N = 3K + 1 + \frac{K}{2\alpha}$ . Next, since  $\mathcal{B} = \emptyset$ ,  $H = 0$ . Finally, since all hints are  $\alpha$ -good, we have

$$\sum_{t=1}^T \mathbb{1}_t \langle c_t, h_t \rangle^2 \leq \sum_{t=1}^T \mathbb{1}_t \langle c_t, h_t \rangle \leq K\sqrt{\|c\|_{1:T}^2},$$

so that we may take  $F = K$ . Therefore, noticing that the expected regret is the actual regret since the algorithm is deterministic, we have

$$\begin{aligned}
\mathcal{R}_{\mathcal{A}_{\text{unc}}}(u, \bar{c}) &\leq 2\epsilon + B\|u\| \log(\|u\|T/\epsilon + 1) + \frac{4A\|u\|(H + N)\sqrt{\log(\|u\|T/\epsilon + 1)}}{M} \\
&\quad + \frac{2AB\|u\|\sqrt{\log(\|u\|T/\epsilon + 1)} \log(2A\|u\|T\sqrt{\log(\|u\|T/\epsilon + 1)})/(M\epsilon + 1)}{M} \\
&\quad + \frac{2A^3F\|u\|\sqrt{\log(\|u\|T/\epsilon + 1)} \log(2A\|u\|T\sqrt{\log(\|u\|T/\epsilon + 1)})/(M\epsilon + 1)}{M^2} \\
&\leq 2\epsilon + B\|u\| \log(\|u\|T/\epsilon + 1) + 4A\|u\| \left( \frac{4}{\alpha} + \frac{1}{K} \right) \sqrt{\log(\|u\|T/\epsilon + 1)} \\
&\quad + \frac{2AB\|u\|\sqrt{\log(\|u\|T/\epsilon + 1)} \log(2A\|u\|T\sqrt{\log(\|u\|T/\epsilon + 1)})/(K\epsilon + 1)}{K} \\
&\quad + \frac{2A^3\|u\|\sqrt{\log(\|u\|T/\epsilon + 1)} \log(2A\|u\|T\sqrt{\log(\|u\|T/\epsilon + 1)})/(K\epsilon + 1)}{K} \\
&\leq 2\epsilon + O\left( \frac{\|u\|\sqrt{\log(\|u\|T/\epsilon + 1)}}{\alpha} + \frac{\|u\| \log^{3/2}(\|u\|T/\epsilon) \log \log(\|u\|T/\epsilon)}{K} \right). \quad \square
\end{aligned}$$
